# Supplementary material for: Biostimulation by direct voltage to enhance anaerobic digestion of waste activated sludge
Source: Royal Society of Chemistry journal article supplement (doi:10.1039/c5ra24134k), 2015-12-18
Supplement: c5ra24134k1.pdf [file c5ra24134k1.pdf]

## Supporting Information

### **Biostimulation by direct voltage to enhance anaerobic digestion of waste activated sludge**

Ying Chen<sup>a</sup>, Bao Yu<sup>a</sup>, Changkai Yin<sup>a</sup>, Xiaohu Dai<sup>b</sup>, Haiping Yuan<sup>a</sup>, Nanwen Zhu<sup>a,\*</sup>

<sup>a</sup> *School of Environmental Science and Engineering, Shanghai Jiao Tong University,*

*Shanghai 200240, China*

<sup>b</sup> *School of Environmental Science and Engineering, Tongji University, Shanghai*

*200092, China*

\* Corresponding author.

Tel/fax: +86-21-34203732;

E-mail: [nwzhu@sjtu.edu.cn](mailto:nwzhu@sjtu.edu.cn)

## Results and Discussion (SI)

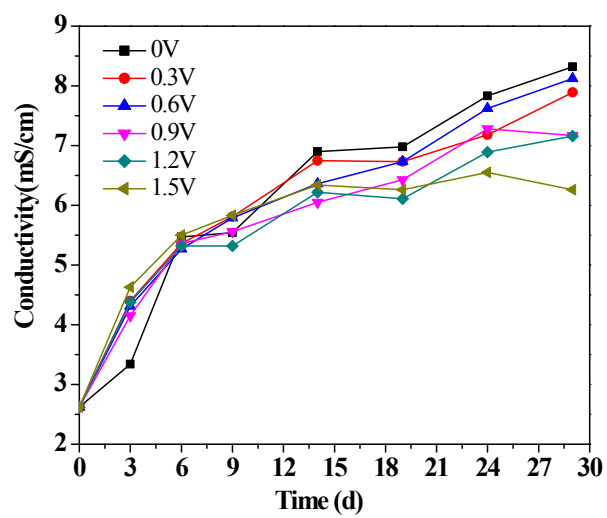

Fig. S1 Conductivity changes during the digestion

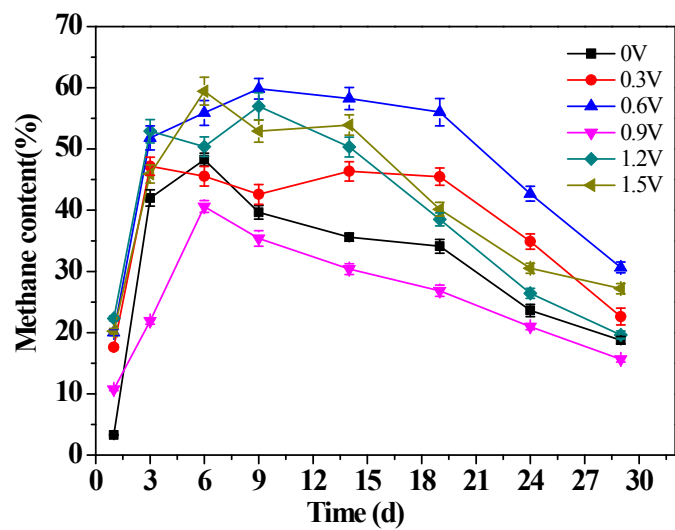

Fig. S2 Variations of the methane content during anaerobic digestion

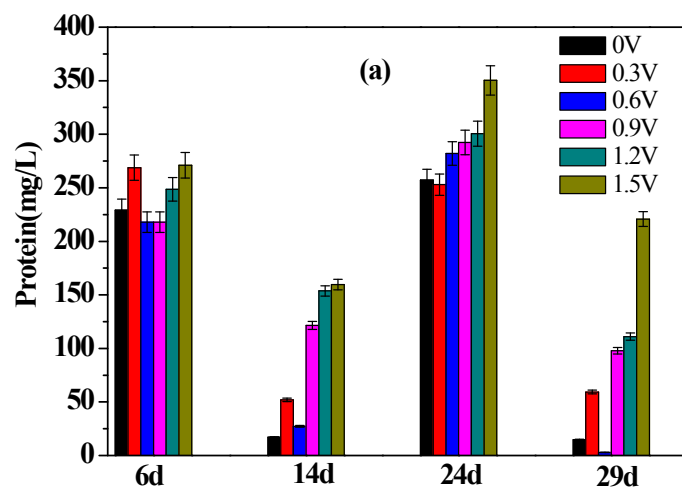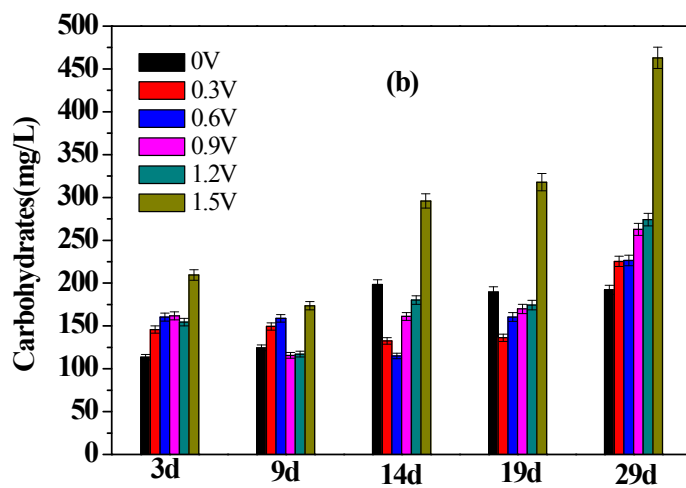

Fig. S3 Effects of different voltages on variations of (a) Proteins (b) Carbohydrates
